# Supplementary material for: Tuning the metal valence state of Pd nanoparticles via codoping of B–N for chlorophenol hydrodechlorination
Source: Royal Society of Chemistry journal article supplement (doi:10.1039/d3nj01080e), 2023-01-01
Supplement: d3nj01080e1.pdf [file d3nj01080e1.pdf]

## Supporting Information

# Tuning the metal valence state of Pd nanoparticles via codoping of B-N for chlorophenol hydrodechlorination

*Jiaxin Zhang,<sup>1,2</sup> Xianlang Chen,<sup>2</sup> Jinhua Yu,<sup>2</sup> Zheng Fang,<sup>2</sup> Lele Yan,<sup>2</sup> Zijian Wang,<sup>2</sup> Zhengyu Pan,<sup>2</sup> Rongrong Li\*<sup>2</sup> and Li Zhang \*<sup>1</sup>*

<sup>1</sup>Department of Chemistry, Key Laboratory of Surface & Interface Science of Polymer Materials of Zhejiang Province. Zhejiang Sci-Tech University, Hangzhou, 310018, People's Republic of China.

<sup>2</sup>Engineering Research Center of Recycling & Comprehensive Utilization of Pharmaceutical and Chemical Waste of Zhejiang Province, Taizhou University, Taizhou 318000, Zhejiang, China.

\*Corresponding author: Email: lrr@tzc.edu.cn (R. Li); lizhang@zstu.edu.cn (L. Zhang)

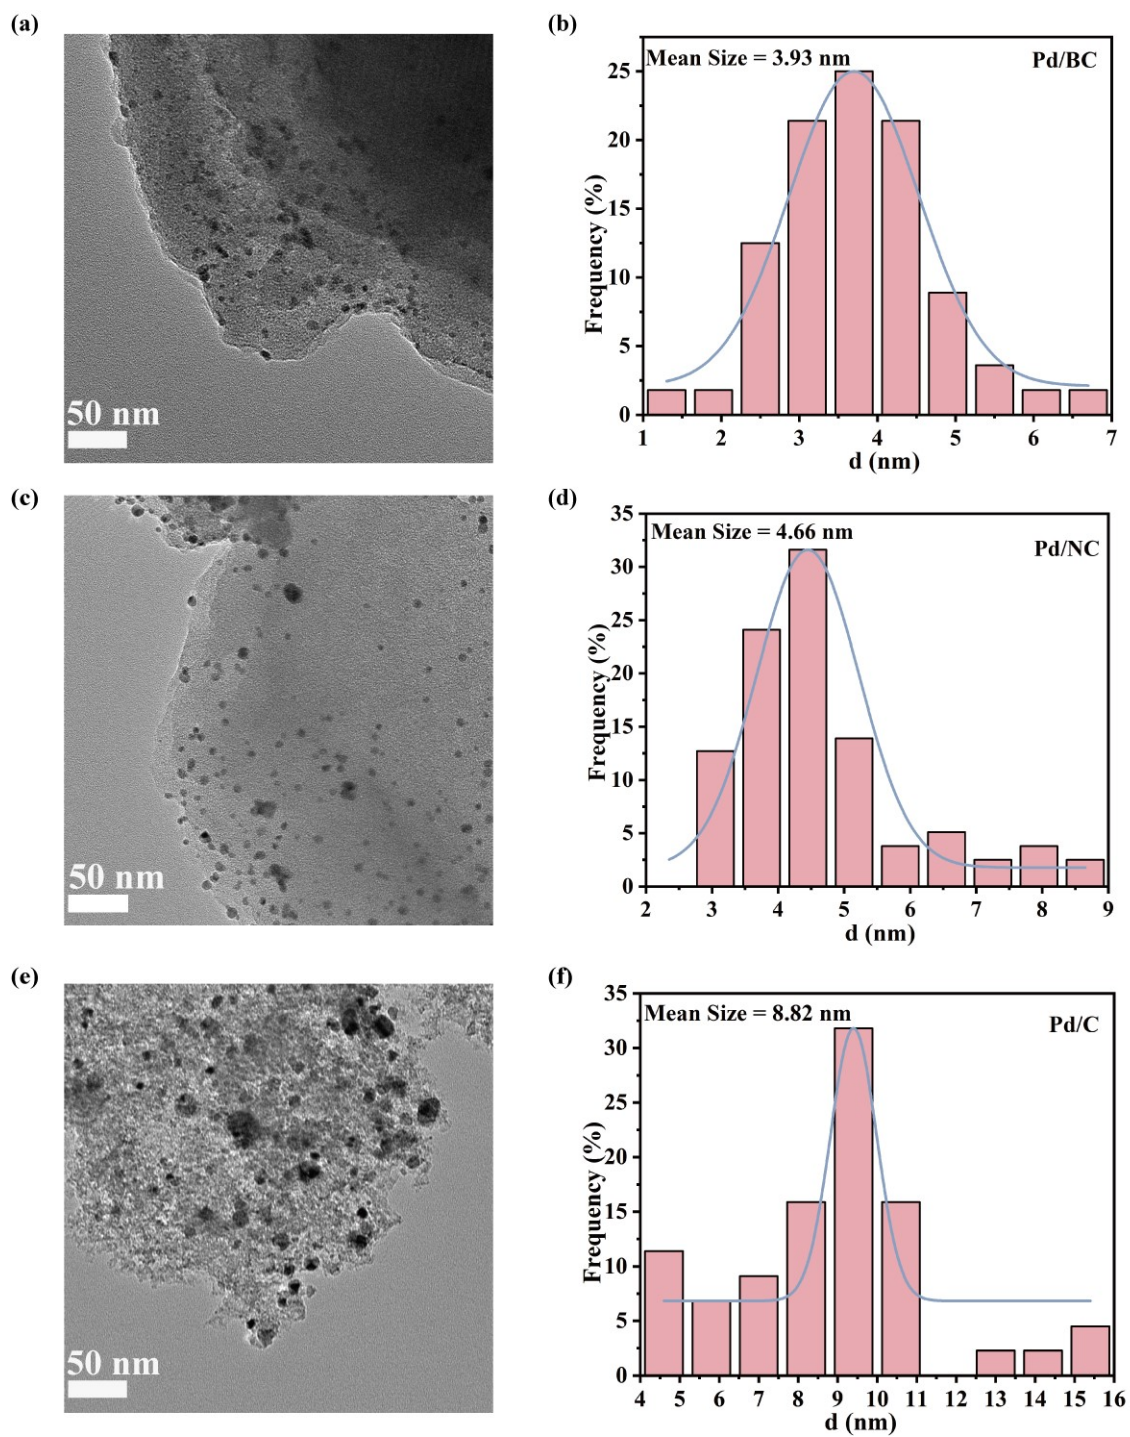

**Figure S1** TEM images of Pd/BC (a), Pd/NC (c), and Pd/C (e) and the corresponding particle size distribution of Pd/BC (b), Pd/NC (d) and Pd/C (f), respectively.

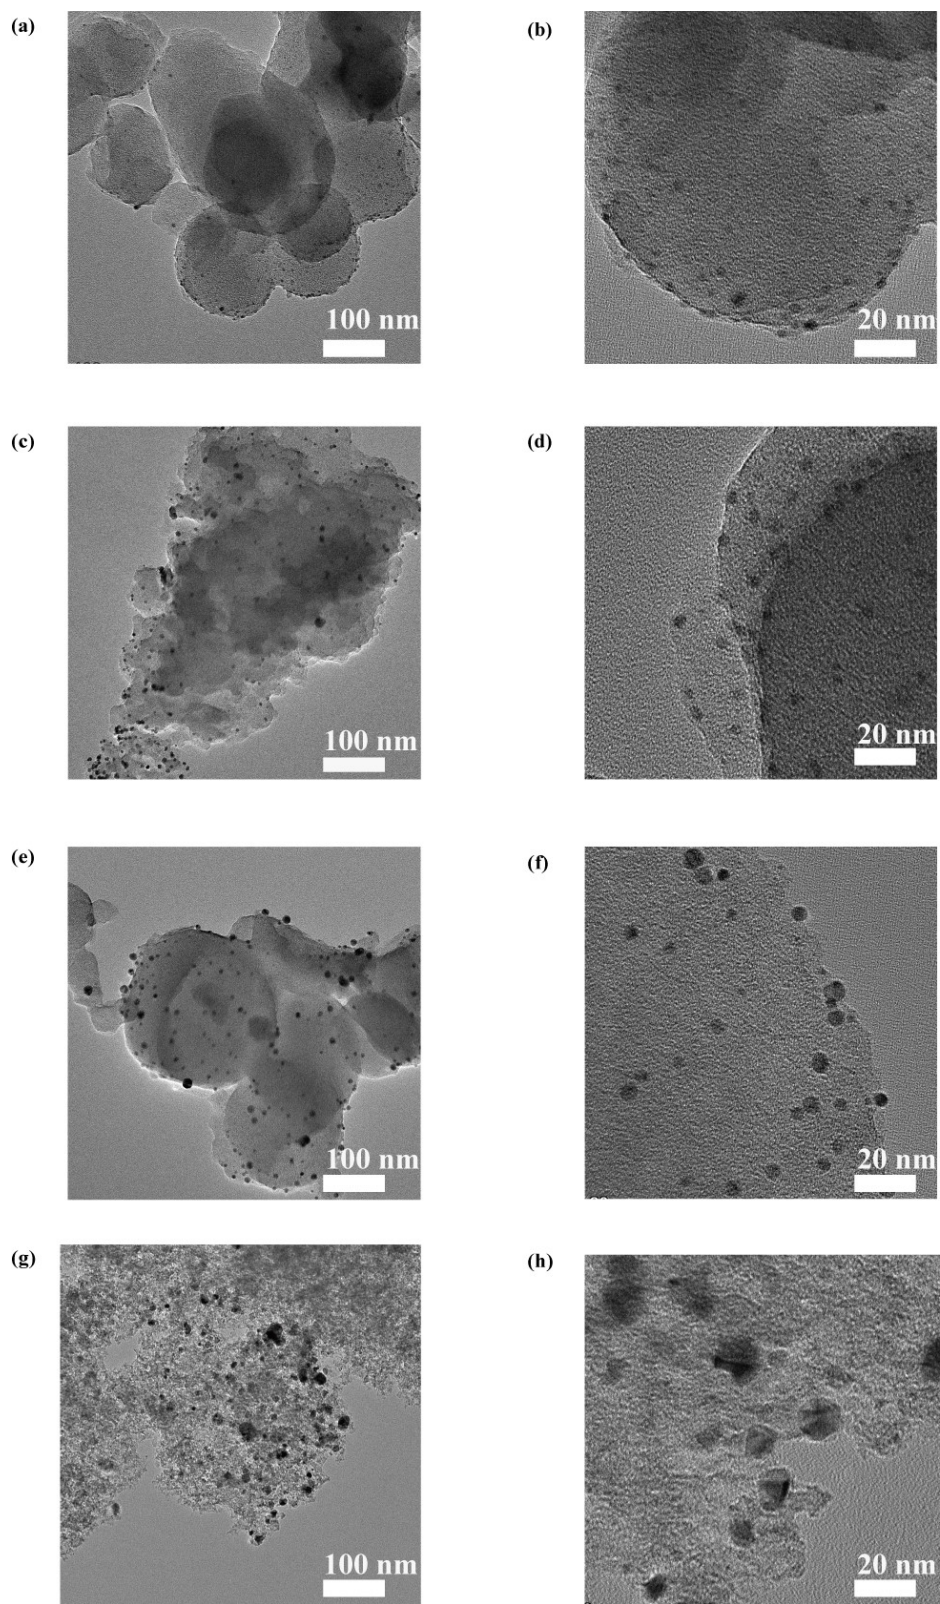

**Figure S2** TEM images of Pd/BNC (a, b), Pd/BC (c, d), Pd/NC (e, f), and Pd/C (g, h) with scale around 100nm and 20nm.



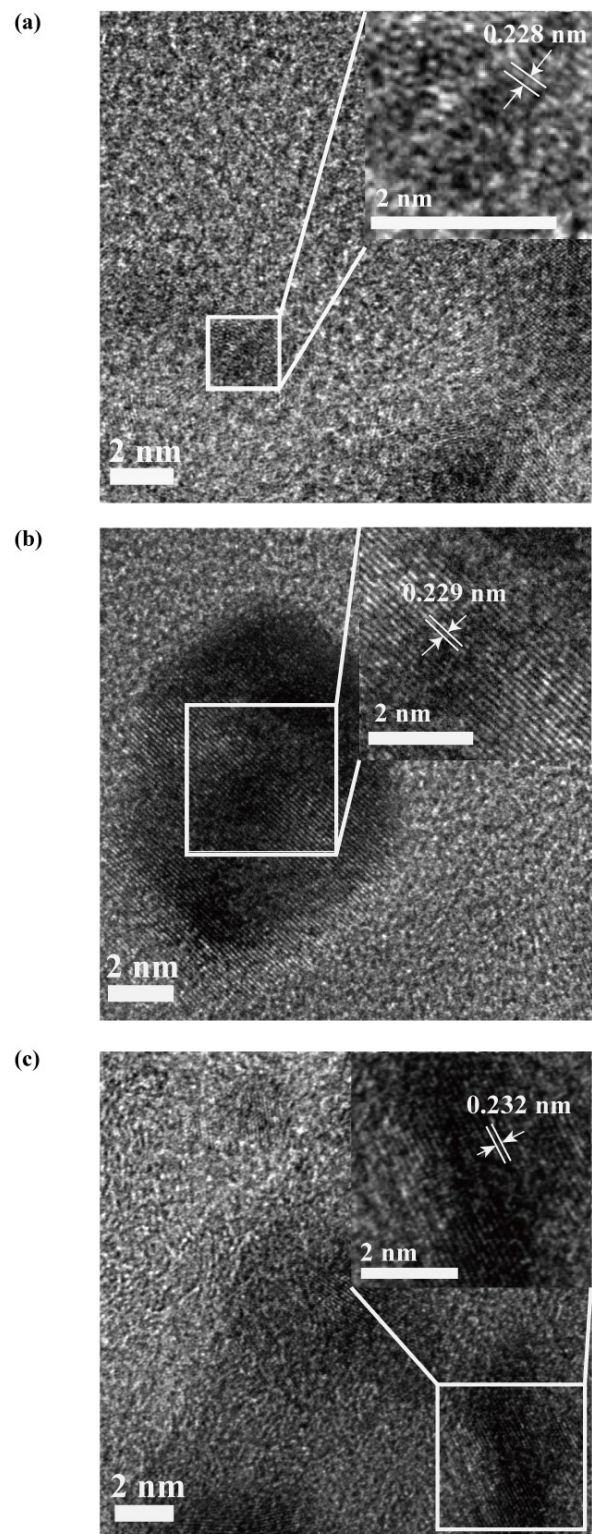

b

**Figure S3** HRTEM image of Pd/BC (a), Pd/NC (b), and Pd/C (c), respectively.

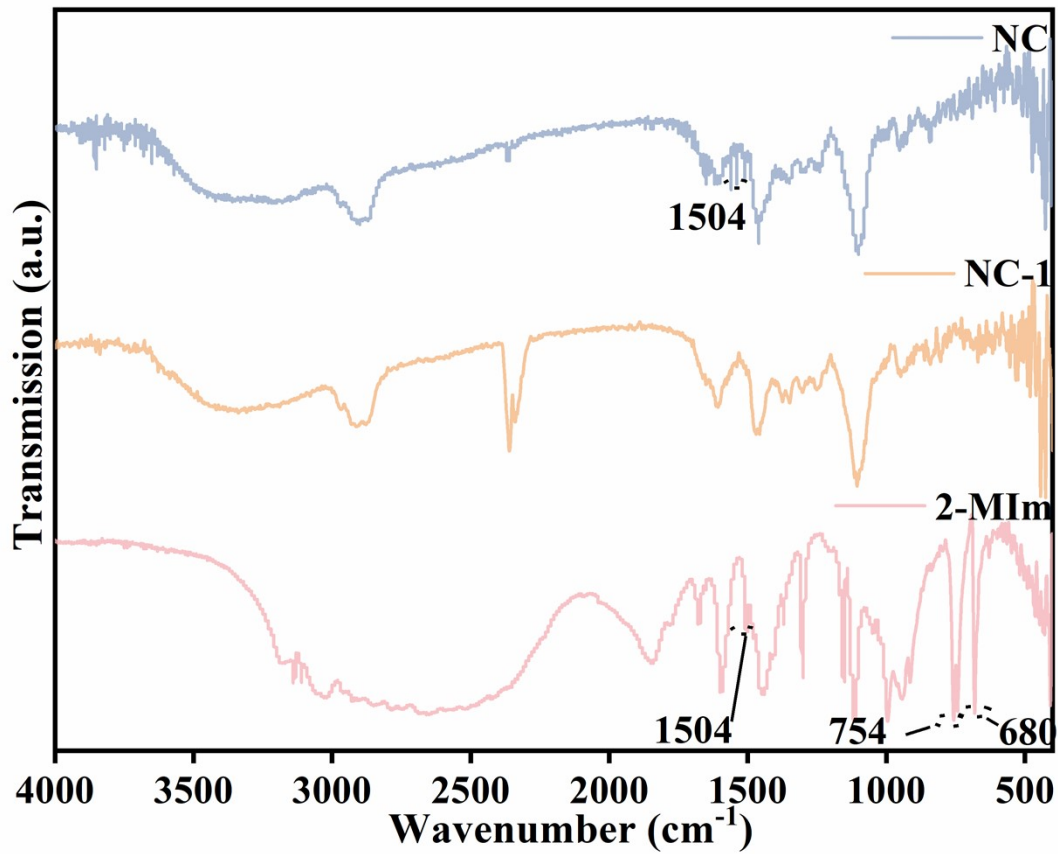

Figure S4 FT-IR spectra of as-NC and as-NC-1 compared with the FT-IR spectra of 2-MIm.

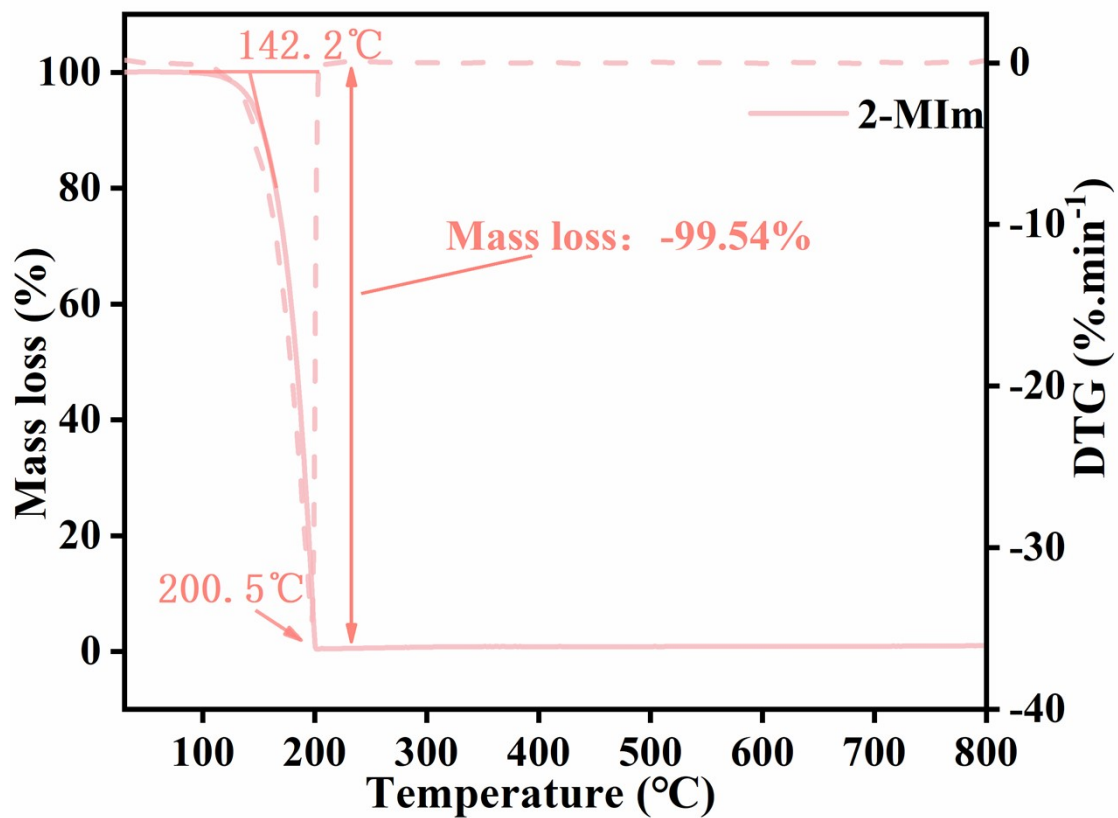

**Figure S5** TGA curve of 2-methylimidazole. The solid line and dashed line represent the curve of mass loss and DTG with temperature, respectively.

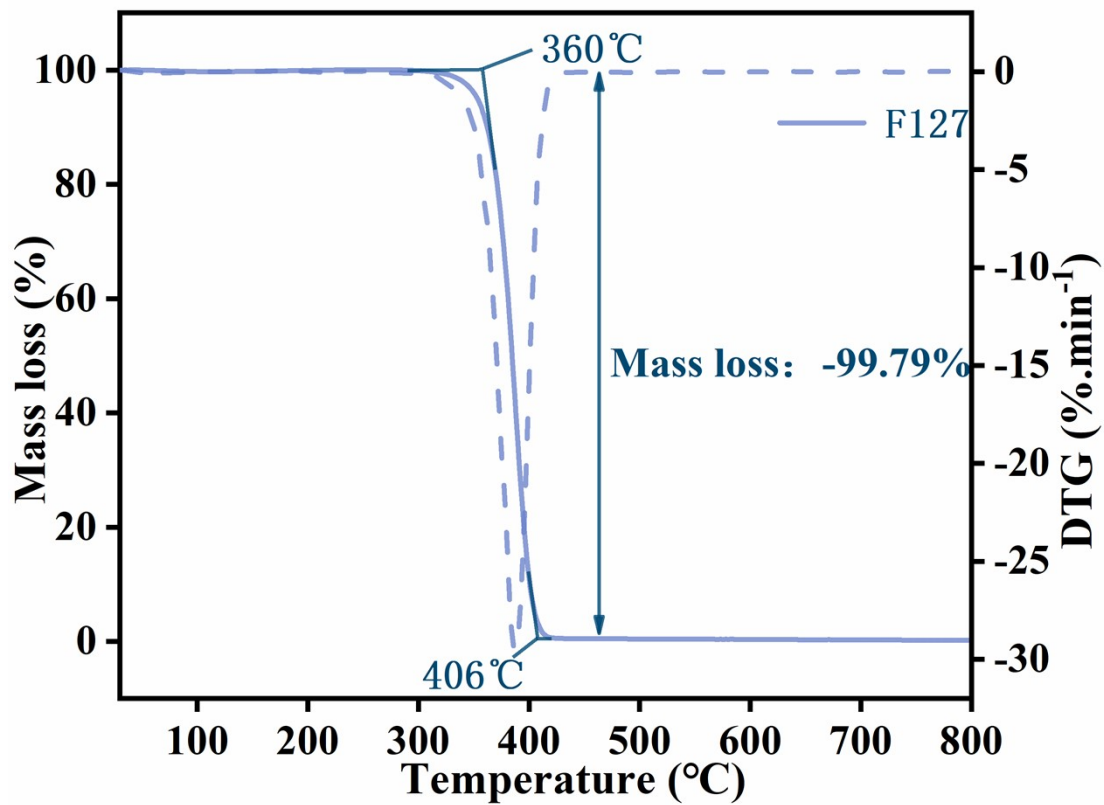

**Figure S6** TGA curve of F127. The solid line and dashed line represent the curve of mass loss and DTG with temperature, respectively.

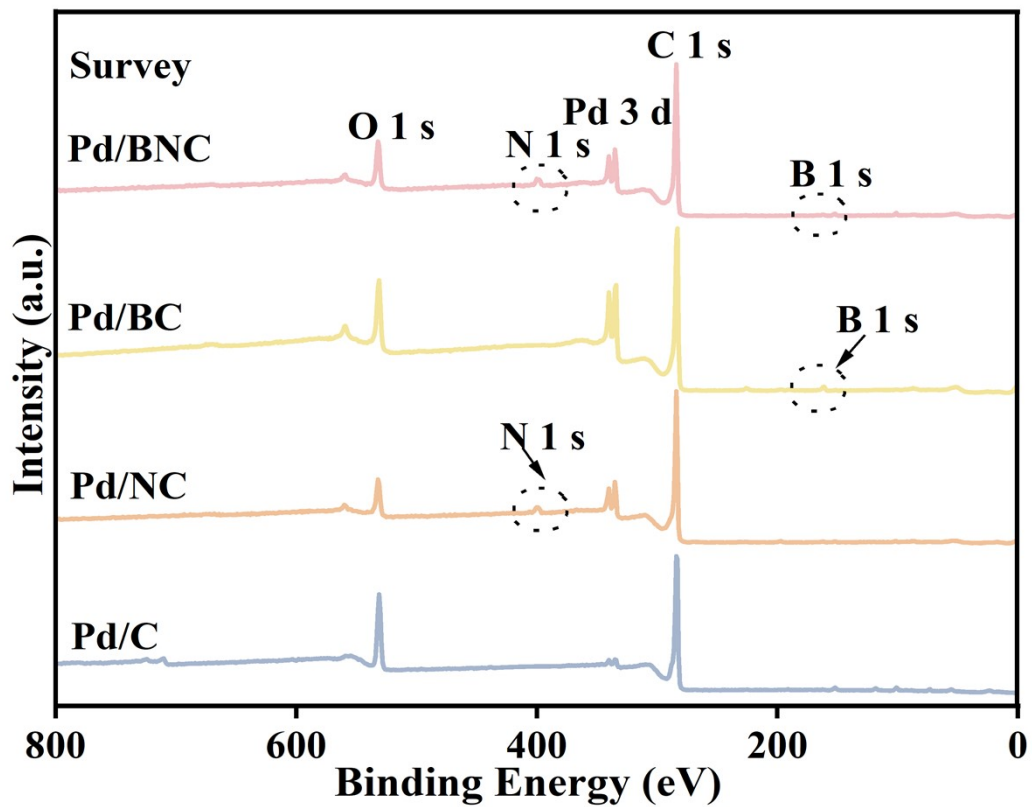

Figure S7 XPS survey spectra of Pd/C, Pd/NC, Pd/BC, and Pd/BNC.



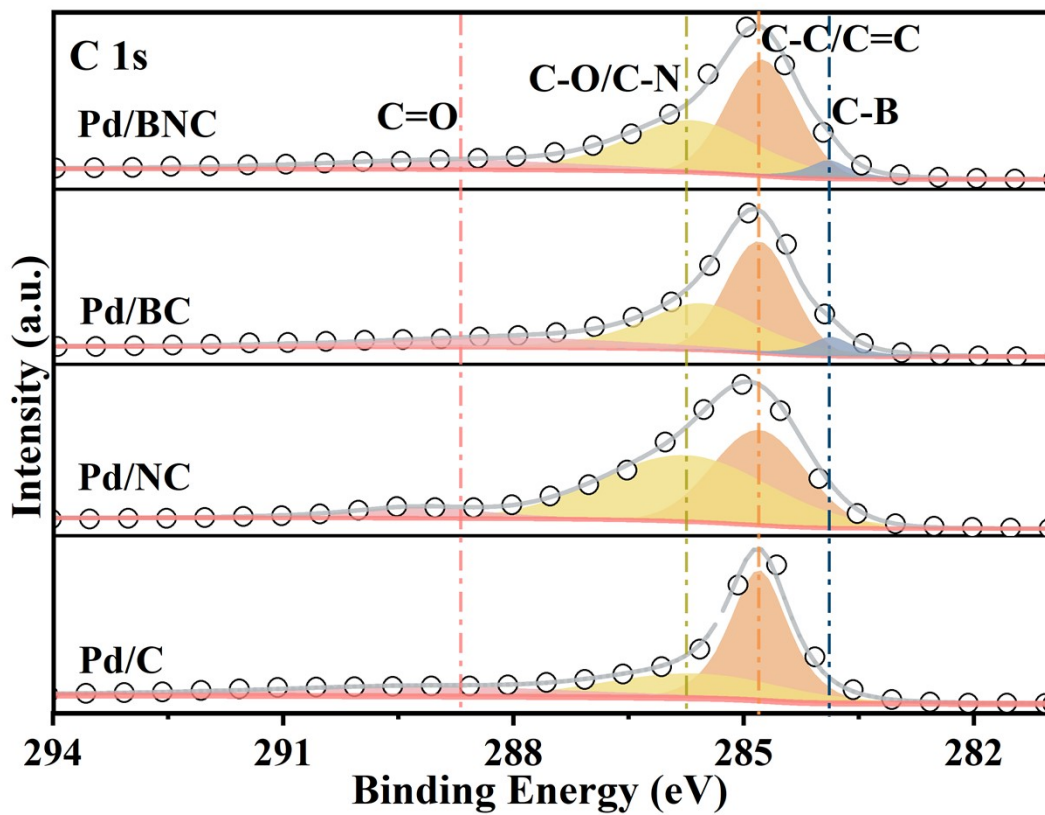

Figure S8 The high-resolution XPS spectra of C 1s in Pd/C, Pd/BC, Pd/NC, and Pd/BNC.

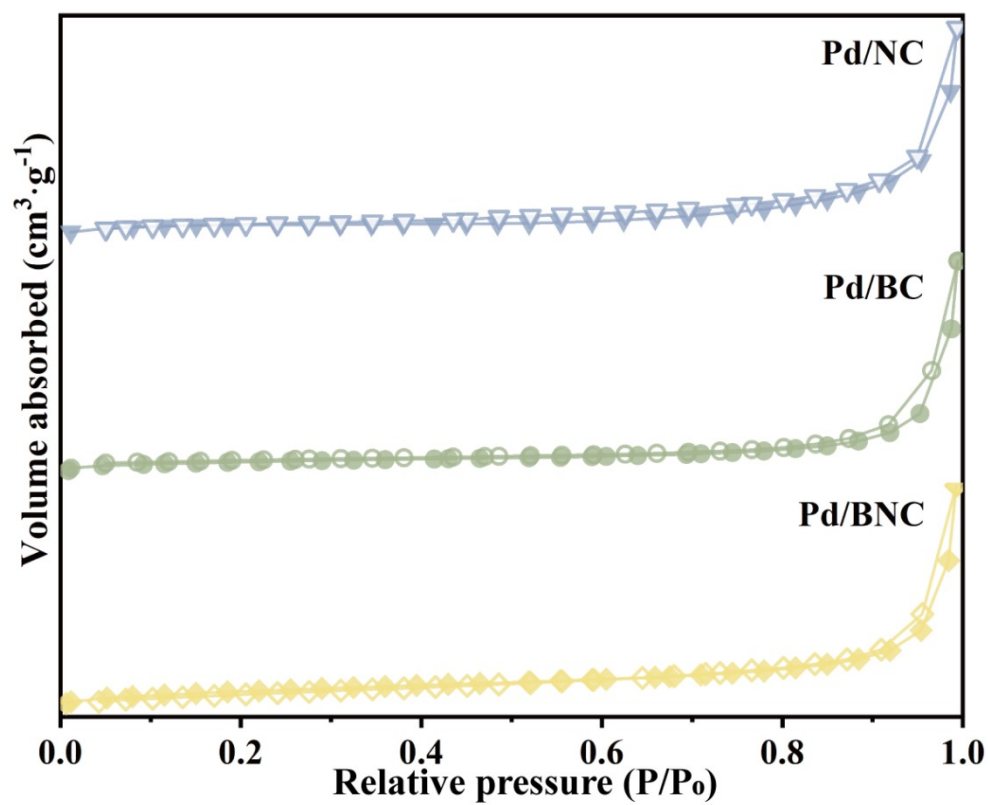

**Figure S9** N<sub>2</sub> adsorption-desorption isotherms at 77K of Pd/NC, Pd/BC, and Pd/BNC.

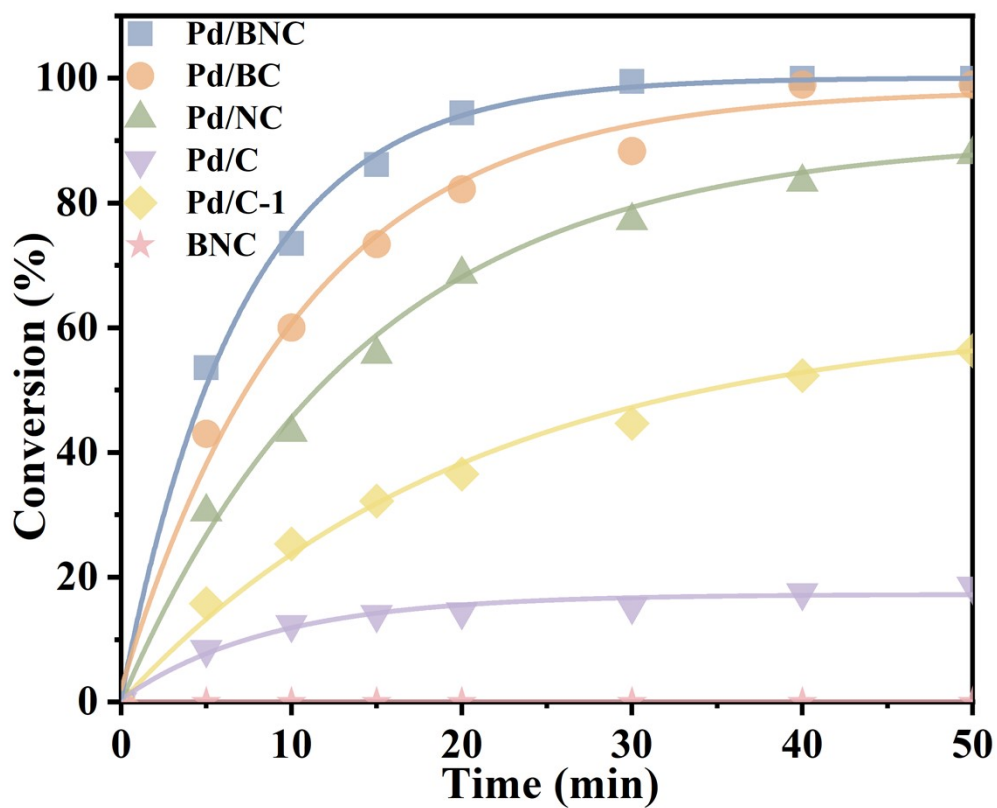

**Figure S10** 4-CP transformation (%) versus time (min) on the HDC for BNC, Pd/C, Pd/C-1, Pd/NC, Pd/BC, and Pd/BNC catalyst (a). Reaction conditions: catalyst: 0.01g, 4-CP: 5mL ( $C_{4-CP}$ : 4 mg/mL), Hydrogen source HCOOH/HCOONa:10 mL (HCOOH: 0.8 mol/L with HCOONa: 1 mol/L), temperature = 40 °C, stirring rate = 1000 rpm.

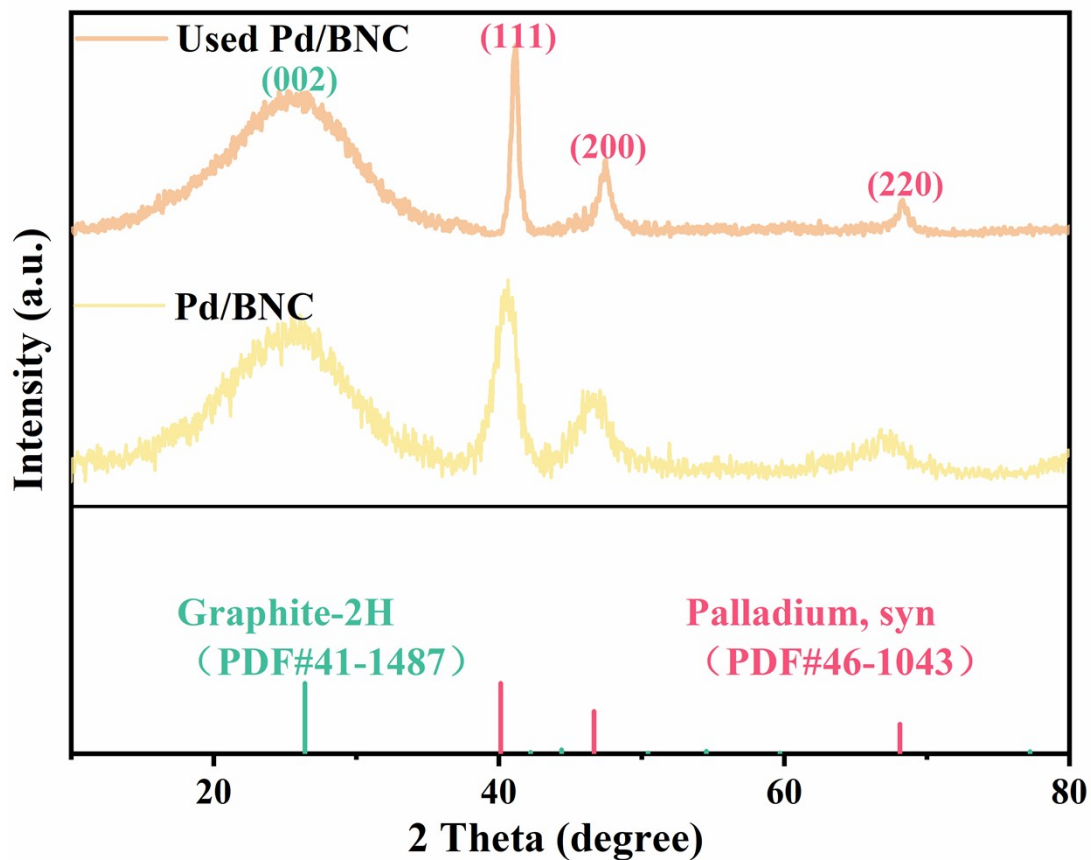

**Figure S11** Structural characterizations of used Pd/BNC catalyst. X-ray powder diffraction patterns for the catalyst before and after 10 cycles used.

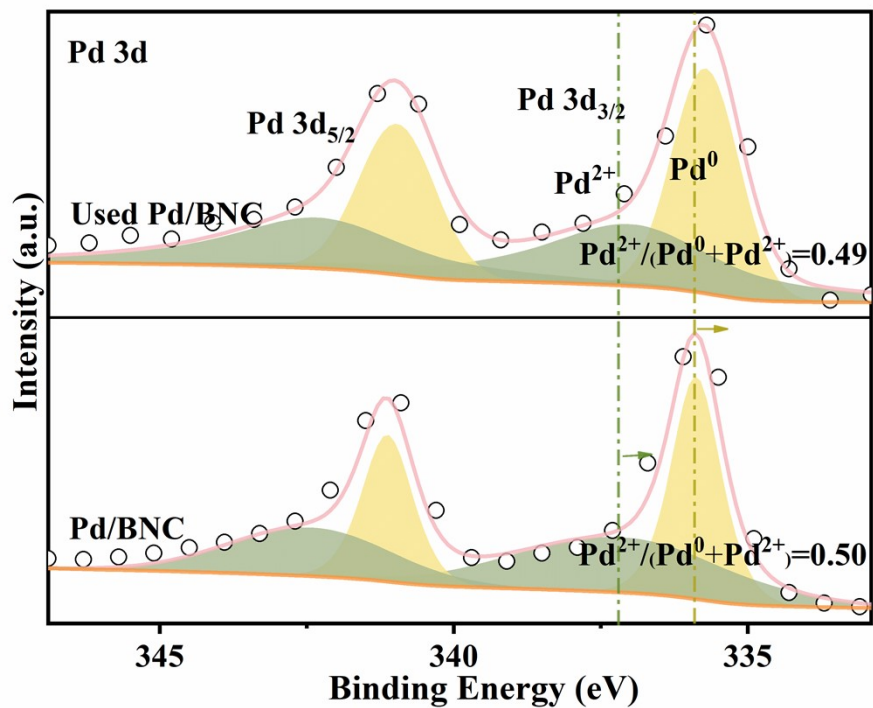

Figure S12 XPS Pd 3d spectra of used Pd/BNC catalyst for 10 run times.

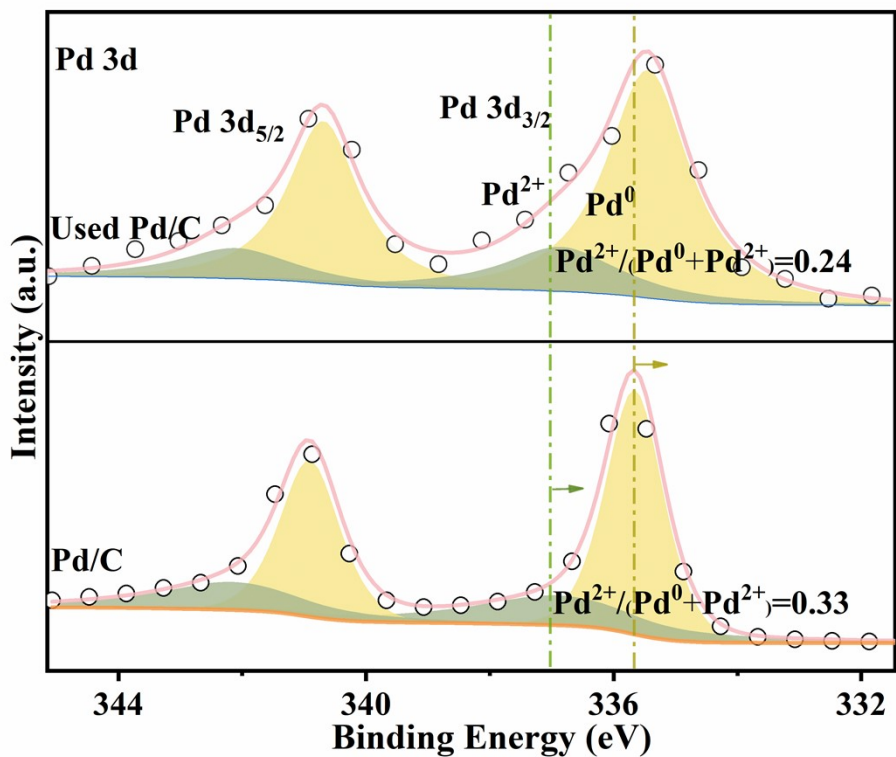

Figure S13 XPS Pd 3d spectra of used Pd/C catalyst for 10 run times.



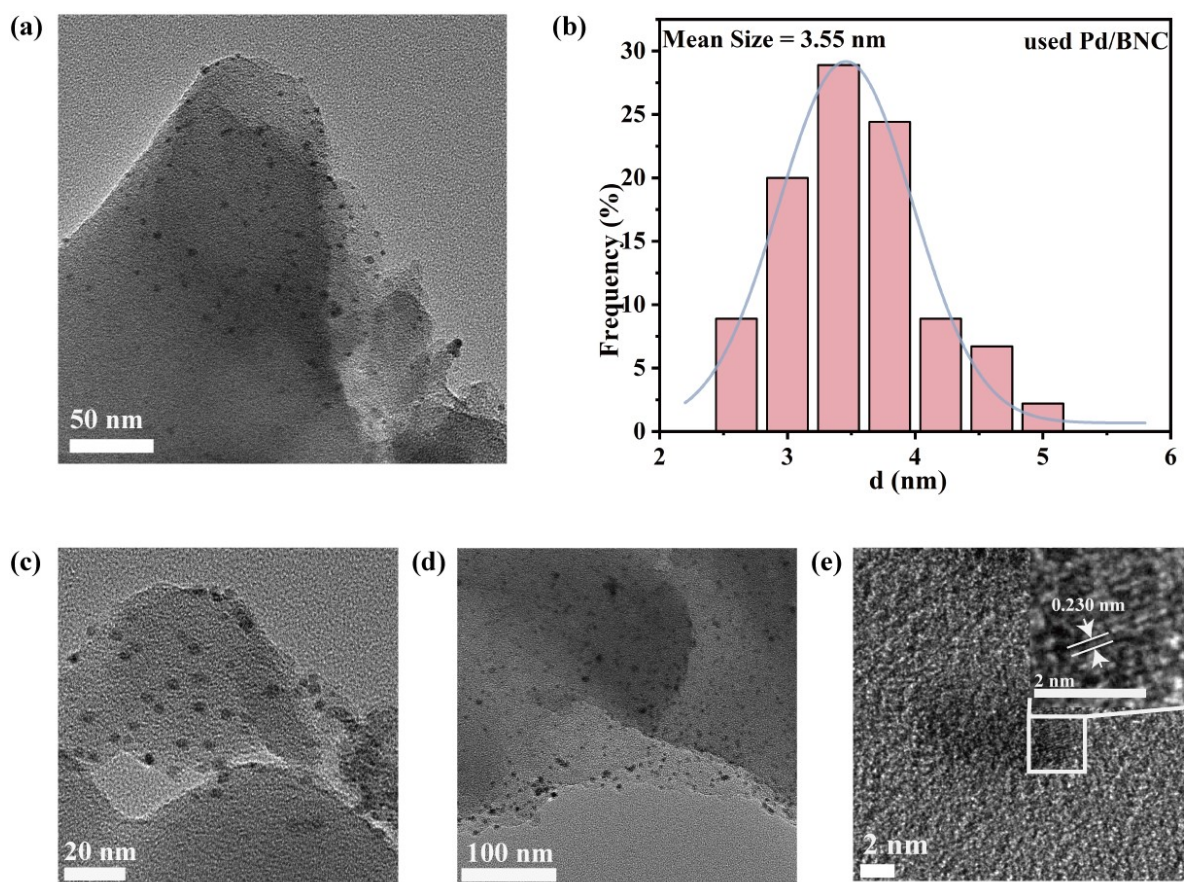

**Figure S14** TEM image with scale around 50 nm (a), 20 nm (c), and 100 nm (d), the corresponding particle size distribution with scale around 50 nm (b), and HAADF-STEM images of used Pd/BNC catalyst for 10 run times (e).

**Table S1.** Pd NPs size values of these Pd/C, Pd/BC, Pd/NC, Pd/BNC using the Sherrer equation.

| Sample         | Pd/C | Pd/NC | Pd/BC | Pd/BNC |
|----------------|------|-------|-------|--------|
| Pd NPs size/nm | 8.2  | 4.2   | 3.7   | 3.5    |

**Table S2** The surface and bulk contents of N, B, Pd in Pd/C, Pd/C-1, Pd/NC, Pd/BC, Pd/BNC.

| Samples | N (w%) |         | B (w%) |         | Pd (w%) |         |
|---------|--------|---------|--------|---------|---------|---------|
|         | Bulk   | Surface | Bulk   | Surface | Bulk    | Surface |
| Pd/C    | —      | —       | —      | —       | 4.98    | 5.62    |
| Pd/C-1  | —      | —       | —      | —       | 4.98    | 4.79    |
| Pd/NC   | 4.74   | 4.60    | —      | —       | 5.00    | 4.75    |
| Pd/BC   | —      | —       | 3.37   | 3.16    | 5.01    | 4.71    |
| Pd/BNC  | 4.96   | 4.70    | 3.40   | 3.31    | 4.99    | 4.82    |

**Table S3.** Specific Surface Area and Pore Structure Results of synthesized carbon materials.

| Sample | $S_{\text{BET}}/\text{m}^2\cdot\text{g}^{-1}$ | $S_{\text{mic}}/\text{m}^2\cdot\text{g}^{-1}$ | $V/\text{cm}^3\cdot\text{g}^{-1}$ | $V_{\text{mic}}/\text{cm}^3\cdot\text{g}^{-1}$ |
|--------|-----------------------------------------------|-----------------------------------------------|-----------------------------------|------------------------------------------------|
| Pd/C   | 408                                           | 179                                           | 0.495                             | 0.392                                          |
| Pd/NC  | 336                                           | 119                                           | 0.221                             | 0.196                                          |
| Pd/BC  | 207                                           | 132                                           | 0.243                             | 0.162                                          |
| Pd/BNC | 277                                           | 123                                           | 0.215                             | 0.179                                          |

**Table S4** Values of the first-order rate constants of Figure 7a for HDC of 4-CP.

| Sample | $k/\text{min}^{-1}$ |
|--------|---------------------|
| Pd/C   | -0.007              |
| Pd/C-1 | -0.023              |
| Pd/NC  | -0.055              |
| Pd/BC  | -0.084              |
| Pd/BNC | -0.140              |
